# Supplementary material for: A gaseous hydrogen chloride chemosensor based on a 2D covalent organic framework
Source: Royal Society of Chemistry journal article supplement (doi:10.1039/c9cc01548e), 2019-01-01
Supplement: c9cc01548e1.pdf [file c9cc01548e1.pdf]

## Electronic Supplementary Information

A gaseous hydrogen chloride chemosensor based on a 2D  
covalent organic framework

Fu-Zhi Cui,<sup>a,b</sup> Jiao-Jiao Xie,<sup>a</sup> Shu-Yan Jiang,<sup>b</sup> Shi-Xian Gan,<sup>b</sup> De-Li Ma,<sup>a,b</sup> Rong-Ran  
Liang,<sup>\*b</sup> Guo-Fang Jiang<sup>\*a</sup> and Xin Zhao<sup>\*b</sup>

<sup>a</sup>State Key Lab of Chemo/Biosensing and Chemometrics, College of Chemistry and  
Chemical Engineering, Hunan University, Changsha 410082, China.

Email: gfjiang@hnu.edu.cn

<sup>b</sup>Key Laboratory of Synthetic and Self-Assembly Chemistry for Organic Functional  
Molecules, Center for Excellence in Molecular Synthesis, Shanghai Institute of  
Organic Chemistry, Chinese Academy of Science, 345 Lingling Road, Shanghai  
200032 China.

Email: liangrr@sioc.ac.cn (R. L.), xzhao@sioc.ac.cn (X. Z.)

## Table of Contents

|                                                                                                                                    |        |
|------------------------------------------------------------------------------------------------------------------------------------|--------|
| <b>Section 1.</b> Instruments and methods.....                                                                                     | S3-S4  |
| <b>Section 2.</b> Synthetic procedure.....                                                                                         | S5     |
| <b>Section 3.</b> Characterizations of <b>COF-ETBA-DAB</b> .....                                                                   | S6-S9  |
| <b>Figure S1.</b> FT-IR spectra of the monomers, <b>COF-ETBA-DAB</b> and <b>COF-ETBA-DAB -HCl</b> .....                            | S6     |
| <b>Figure S2.</b> Solid-state <sup>13</sup> C CP/MAS NMR Spectrum of <b>COF-ETBA-DAB</b> .....                                     | S6     |
| <b>Figure S3.</b> TGA profile of <b>COF-ETBA-DAB</b> .....                                                                         | S7     |
| <b>Figure S4.</b> SEM image of <b>COF-ETBA-DAB</b> .....                                                                           | S7     |
| <b>Scheme S1.</b> The two possible framework structures which theoretically can be assembled from <b>ETBA</b> and <b>DAB</b> ..... | S8     |
| <b>Figure S5.</b> N <sub>2</sub> adsorption–desorption isotherm (77 K) of <b>COF-ETBA-DAB</b> .....                                | S8     |
| <b>Figure S6.</b> BET surface area plot for <b>COF-ETBA-DAB</b> .....                                                              | S9     |
| <b>Table S1.</b> Fractional atomic coordinates of <b>COF-ETBA-DAB</b> .....                                                        | S9-S10 |

## **Section 1. Instruments and methods.**

### **Fourier transform infrared spectroscopy (FT-IR)**

Fourier transform infrared spectroscopy (FT-IR) was carried out with a Nicolet 380 FT-IR spectrometer. The samples for IR study were prepared as KBr pellets.

### **Solid-state nuclear magnetic resonance (NMR) spectroscopy**

The  $^{13}\text{C}$  CP/MAS NMR spectrum of the COF was recorded on an Agilent DD2 600 Solid NMR System with 4 mm zirconia rotors. The spinning rate is 8 kHz and the contact time is 3 ms.

### **Thermal gravimetric analysis (TGA)**

Thermal gravimetric analysis was conducted on a Waters TGA Q500 instrument by heating the sample from room temperature to 1000 °C under nitrogen atmosphere with a heating rate of 10 °C/min.

### **Scanning electron microscopy (SEM)**

Scanning electron microscopy was carried out using a FEI NOVA NANOSEM 450 scanning electron microscope. The sample was dispersed over the slice of silicon wafer adhered to flat copper platform sample holder and then coated with gold using a sputter coater (ambient temperature, 85 torr pressure in an nitrogen atmosphere, pattered for 30 s from a solid gold target at a current at 30 mA) before being submitted to SEM characterization.

### **Powder X-ray diffraction**

Powder X-ray diffraction measurement was carried out with an PANalytical X'Pert Powder system using monochromated  $\text{Cu}/\text{K}\alpha$  ( $\lambda = 0.1542$  nm). The sample was spread on the square recess of XRD sample holder as a thin layer.

### **Nitrogen adsorption-desorption isotherm measurement**

The measurement was carried out using a Micromeritics ASAP 2020 system. Before

gas adsorption measurement, the as-synthesized COF was washed by anhydrous acetone using Soxhlet extractor. The sample was then dried under dynamic vacuum at 120 °C for 4 h. The resulting sample was activated by degassing at 200 °C for 4 h and used for gas adsorption measurement from 0 to 1 atm at 77 K. The Brunauer-Emmett-Teller (BET) method was utilized to calculate its specific surface area. By using the non-local density functional theory model, the pore size distribution was derived from the sorption data.

### **Structural simulation and powder X-ray diffraction analysis**

The Pawley refinement of the experimental PXRD was conducted by the Reflex module in the Materials Studio 7.0. Before the simulations, the structures were firstly optimized in Gaussian 09 package by semiempirical calculations at PM3 level. The simulations of the possible structures were carried out in Accelrys Materials Studio 7.0 software package. The stimulated PXRD patterns were determined by the Reflex module. P1 space group was chosen for the primitive models in the initial simulations.

## Section 2. Synthetic procedure

### Synthesis of COF-ETBA-DAB

**COF-ETBA-DAB** was obtained with 4,4',4'',4'''-(ethane-1,1,2,2-tetrayl) tetrabenzaldehyde (**ETBA**, 26.64 mg, 0.06 mmol, prepared according to the published procedure<sup>1</sup>) and p-phenylenediamine (**DAB**, 12.96 mg, 0.12 mmol,) as monomers in a mixture of mesitylene/1,4-dioxane( 1:1, v/v, 2 mL), and acetic acid (aq. 6M, 0.2 mL) in a glass ampoule. After three freeze-pump-thaw cycles, the glass tube was sealed under vacuum. The mixture was then heated at 120 °C for 72 h to afford a yellow solid at the bottom of the tube. After being cooled to room temperature, the solvent was decanted and the solid was washed with anhydrous acetone using Soxhlet extractor and then dried under dynamic vacuum at 120 °C for 4 h to afford a yellow powder (28 mg, 70.71%), which was insoluble in common organic solvents such as dichloromethane, ethanol, and N, N-dimethylformamide. Anal. Calcd. For chemical formula C<sub>42</sub>H<sub>28</sub>N<sub>4</sub>: C, 85.69; H, 4.79; N, 9.52. Found: C, 81.03; H, 5.69; N, 8.31.

### Reference

1 H. Qu, Y. Wang, Z. Li, X. Wang, H. Fang, Z. Tian and X. Cao, *J. Am. Chem. Soc.*, 2017, **139**, 18142.

### Section 3. Characterizations of the COF-ETBA-DAB

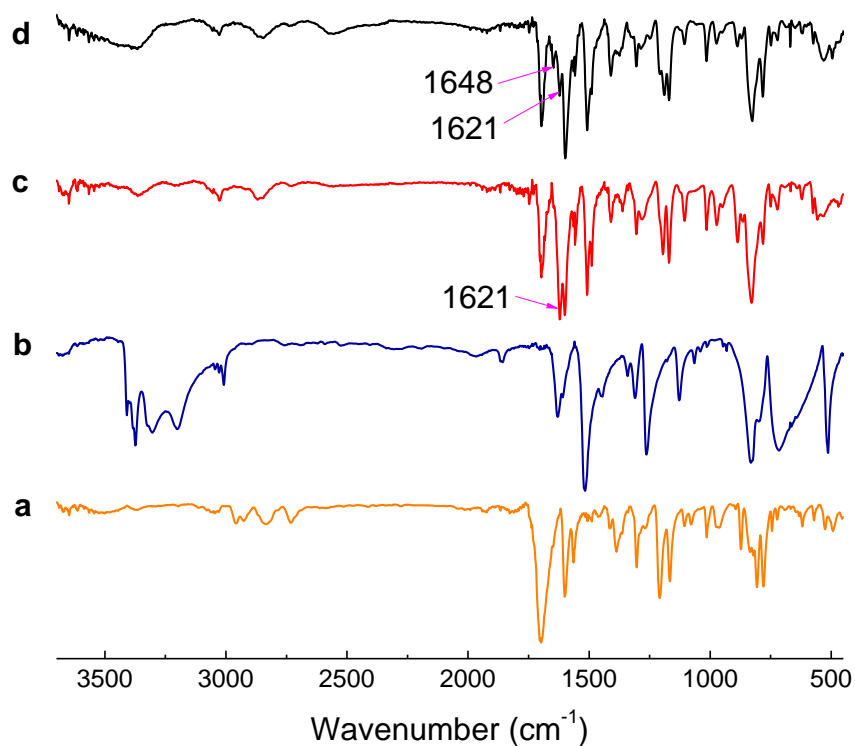

**Figure S1.** FT-IR spectra of (a) **ETBA**, (b) **DAB**, (c) **COF-ETBA-DAB**, and (d) **COF-ETBA-DAB-HCl**.

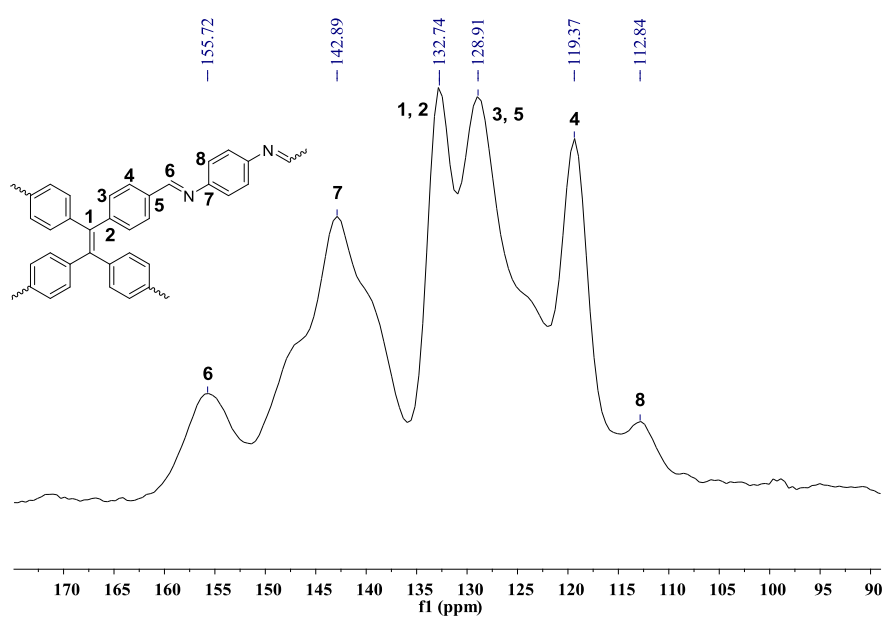

**Figure S2.** Solid-state  $^{13}\text{C}$  CP/MAS NMR spectrum of **COF-ETBA-DAB**.

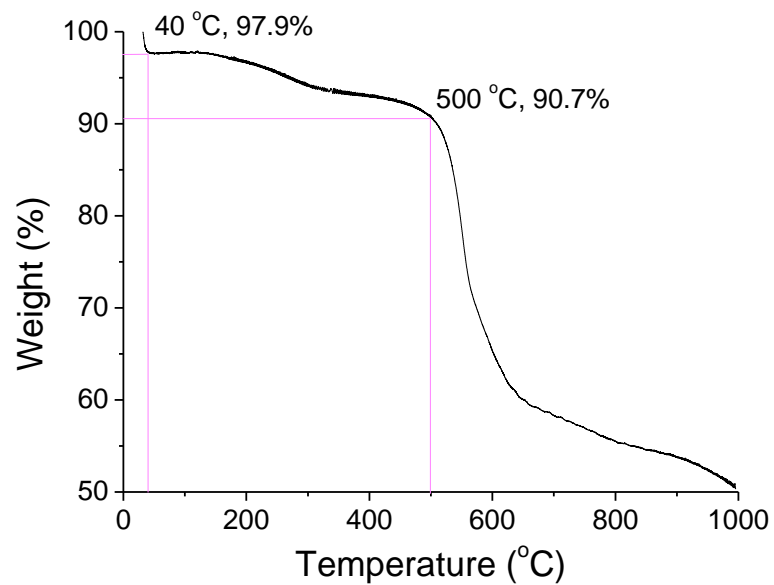

**Figure S3.** TGA profile of **COF-ETBA-DAB**. The decrease in weight before 40 °C might be attributed to the loss of small molecules encapsulated in the COF.

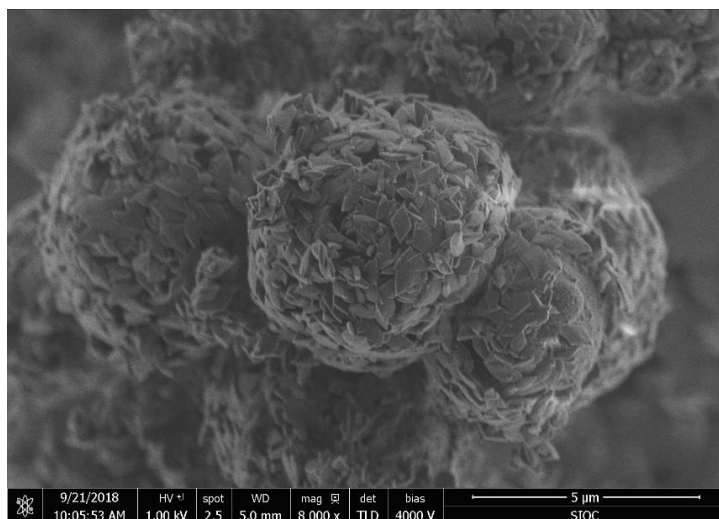

**Figure S4.** SEM image of **COF-ETBA-DAB**.

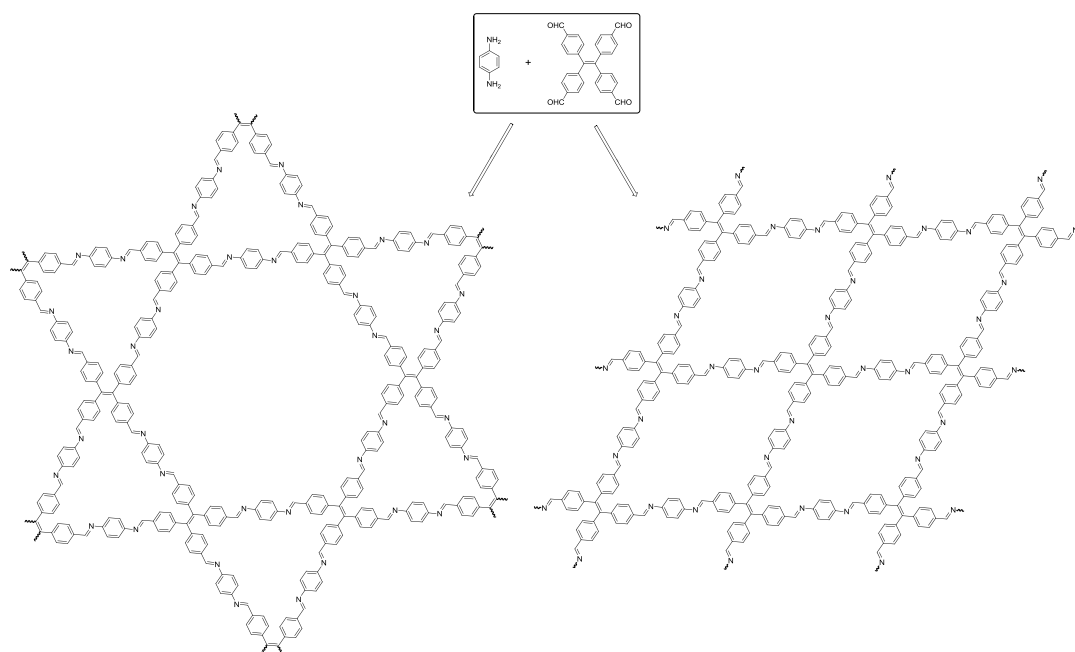

**Scheme S1.** The two possible framework structures which theoretically can be assembled from **ETBA** and **DAB**.

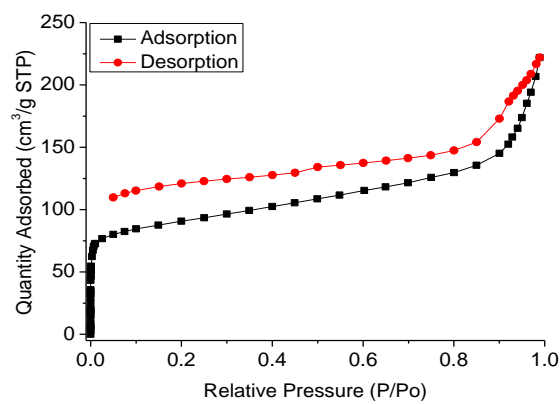

**Figure S5.**  $N_2$  adsorption-desorption isotherm (77 K) of **COF-ETBA-DAB**.



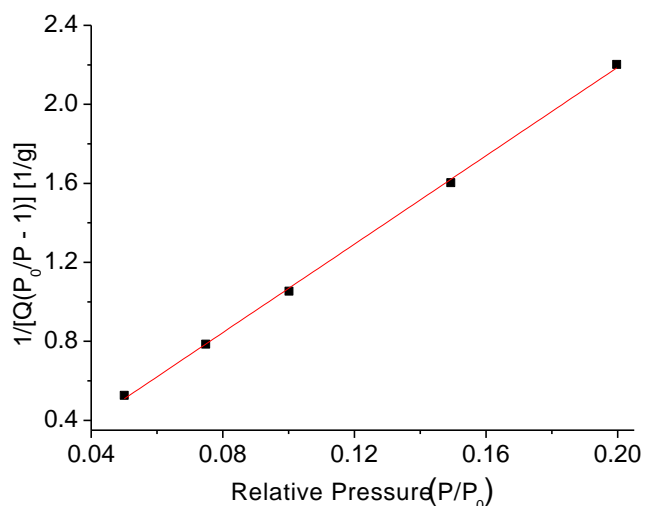

**Figure S6.** BET surface area plot for **COF-ETBA-DAB**.

**Table S1.** Fractional atomic coordinates for the unit cell of **COF-ETBA-DAB** with AA stacking.

| P1                                                                                                                  |          |          |          |     |          |          |          |
|---------------------------------------------------------------------------------------------------------------------|----------|----------|----------|-----|----------|----------|----------|
| $a = b = 19.50 \text{ \AA}$ , and $c = 4.60 \text{ \AA}$ , and $\alpha = \beta = 90^\circ$ and $\gamma = 113^\circ$ |          |          |          |     |          |          |          |
| H1                                                                                                                  | 0.429759 | 1.583347 | 1.28226  | C10 | 0.538537 | 1.699632 | 0.630735 |
| H2                                                                                                                  | 0.551224 | 1.586118 | 1.172744 | C11 | 0.467367 | 1.695551 | 0.686481 |
| H3                                                                                                                  | 0.568282 | 1.733006 | 0.443443 | C12 | 0.410139 | 1.801066 | 0.980539 |
| H4                                                                                                                  | 0.443508 | 1.724452 | 0.537107 | C13 | 0.409882 | 1.870339 | 1.040371 |
| H5                                                                                                                  | 0.4592   | 1.802552 | 0.862038 | C14 | 0.35151  | 1.879533 | 1.190824 |
| H6                                                                                                                  | 0.457135 | 1.919058 | 0.960161 | C15 | 0.294527 | 1.814053 | 1.291593 |
| H7                                                                                                                  | 0.248078 | 1.817155 | 1.418686 | C16 | 0.295031 | 1.744315 | 1.234378 |
| H8                                                                                                                  | 0.24908  | 1.695856 | 1.321258 | C17 | 0.192948 | 1.645855 | 0.839902 |
| H9                                                                                                                  | 0.237621 | 1.695932 | 0.756712 | C18 | 0.121053 | 1.642841 | 0.814766 |
| H10                                                                                                                 | 0.113174 | 1.690572 | 0.715749 | C19 | 0.059531 | 1.580994 | 0.913077 |
| H11                                                                                                                 | 0.029193 | 1.471181 | 1.104619 | C20 | 0.074796 | 1.521931 | 1.029364 |
| H12                                                                                                                 | 0.15007  | 1.474433 | 1.143618 | C21 | 0.146483 | 1.524898 | 1.055207 |
| H13                                                                                                                 | 0.233178 | 1.476955 | 1.399725 | C22 | 0.264114 | 1.464867 | 1.220534 |

|     |          |          |          |     |          |          |          |
|-----|----------|----------|----------|-----|----------|----------|----------|
| H14 | 0.241111 | 1.356744 | 1.394011 | C23 | 0.270006 | 1.396324 | 1.221045 |
| H15 | 0.384212 | 1.422211 | 0.636285 | C24 | 0.313042 | 1.377813 | 1.013521 |
| H16 | 0.368028 | 1.538639 | 0.620753 | C25 | 0.349123 | 1.432452 | 0.804102 |
| H17 | 0.673742 | 1.701569 | 0.541677 | C26 | 0.340301 | 1.49952  | 0.794575 |
| H18 | 0.35736  | 1.300501 | 0.830374 | C27 | 0.646346 | 1.666997 | 0.73012  |
| H19 | 0.728288 | 1.546823 | 1.193295 | C28 | 0.749548 | 1.63284  | 0.866072 |
| H20 | 0.851147 | 1.543437 | 1.17107  | C29 | 0.322306 | 1.307426 | 1.006082 |
| H21 | 0.915728 | 1.716176 | 0.513136 | C30 | 0.293241 | 1.185546 | 1.220361 |
| H22 | 0.792518 | 1.719828 | 0.53697  | C31 | 0.769041 | 1.584171 | 1.040293 |
| H23 | 0.205527 | 1.144995 | 1.544304 | C32 | 0.83911  | 1.582137 | 1.025952 |
| H24 | 0.209272 | 1.021637 | 1.58912  | C33 | 0.89378  | 1.628818 | 0.835417 |
| H25 | 0.384855 | 1.082596 | 0.943564 | C34 | 0.874571 | 1.678221 | 0.663552 |
| H26 | 0.382143 | 1.204308 | 0.903465 | C35 | 0.804312 | 1.68013  | 0.677355 |
| H27 | 0.941044 | 1.520136 | 0.980974 | C36 | 0.245644 | 1.131738 | 1.411195 |
| H28 | 0.410545 | 0.999069 | 1.167319 | C37 | 0.247772 | 1.061679 | 1.436852 |
| C1  | 0.351331 | 1.657885 | 0.996631 | C38 | 0.298019 | 1.041371 | 1.274357 |
| C2  | 0.288652 | 1.591984 | 0.996381 | C39 | 0.345337 | 1.095211 | 1.082254 |
| C3  | 0.350992 | 1.73506  | 1.064581 | C40 | 0.343285 | 1.165126 | 1.056861 |
| C4  | 0.427216 | 1.656921 | 0.929427 | C41 | 0.982595 | 1.573237 | 0.902018 |
| C5  | 0.297185 | 1.517576 | 1.00128  | C42 | 0.356886 | 0.955341 | 1.229036 |
| C6  | 0.208686 | 1.588336 | 0.971655 | N1  | 0.677593 | 1.632669 | 0.890409 |
| C7  | 0.459196 | 1.616819 | 1.096649 | N2  | 0.289526 | 1.256257 | 1.198018 |
| C8  | 0.529171 | 1.61842  | 1.032374 | N3  | 0.965641 | 1.628133 | 0.817431 |
| C9  | 0.571859 | 1.661264 | 0.801191 | N4  | 0.299389 | 0.96965  | 1.300744 |
